# Supplementary material for: Interleukin-11 promotes epithelial-mesenchymal transition in anaplastic thyroid carcinoma cells through PI3K/Akt/GSK3β signaling pathway activation
Source: PubMed Central journal article supplement (PMC5312338; doi:10.18632/oncotarget.10831), 2016-07-25
Supplement: oncotarget-07-59652-s001.pdf [file oncotarget-07-59652-s001.pdf]

# Interleukin-11 promotes epithelial-mesenchymal transition in anaplastic thyroid carcinoma cells through PI3K/Akt/GSK3 $\beta$ signaling pathway activation

## SUPPLEMENTARY FIGURES

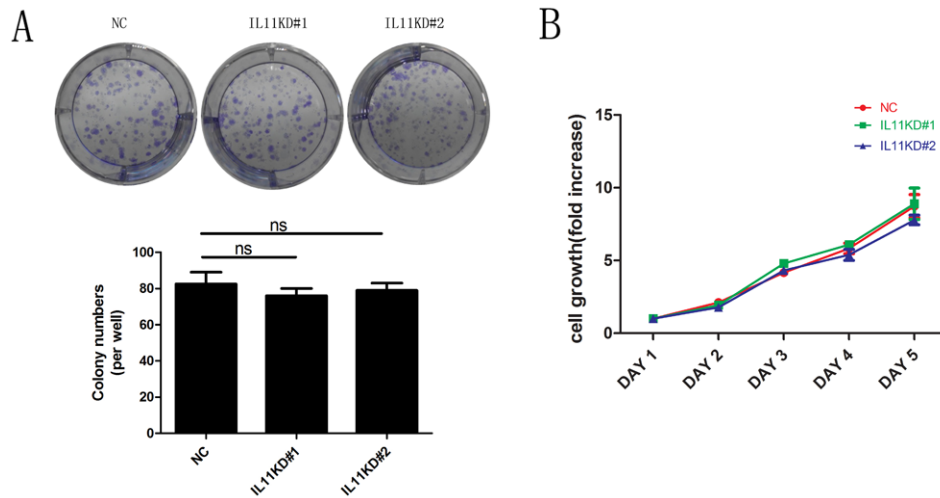

**Supplementary Figure S1: Knockdown of IL-11 in sw579 cells does not influence cell proliferation.** A. Colony formation assay or B. proliferation assay results for IL-11 shRNA- or NC-transfected sw579 cells.

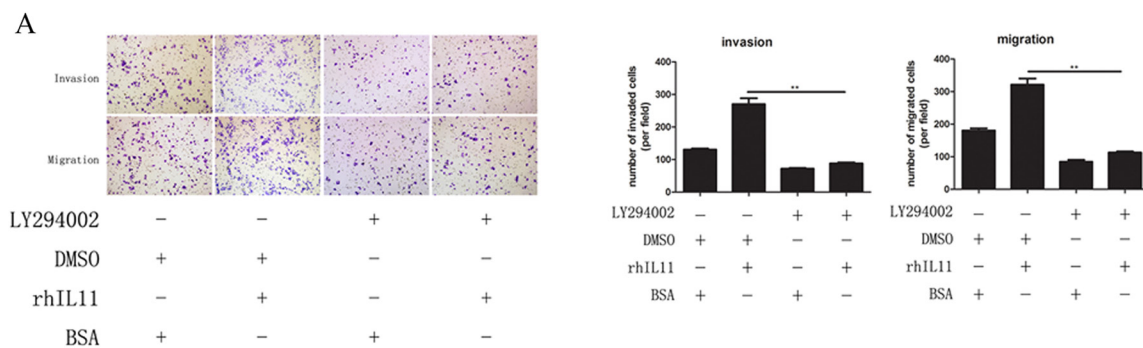

**Supplementary Figure S2: IL-11 promotes the invasive and migratory abilities of ATC cells via the PI3K/Akt/GSK3 $\beta$ /Snail pathway.** A. The invasive and migratory abilities of sw579 cells were evaluated by transwell assay after pretreatment with 20  $\mu$ M LY294002 or 100 ng/ml rhIL-11. Migrated cells were plotted as the average number of cells per field. Photomicrographs are at 100 $\times$  magnification. Bars correspond to the mean  $\pm$  SD of three independent experiments.

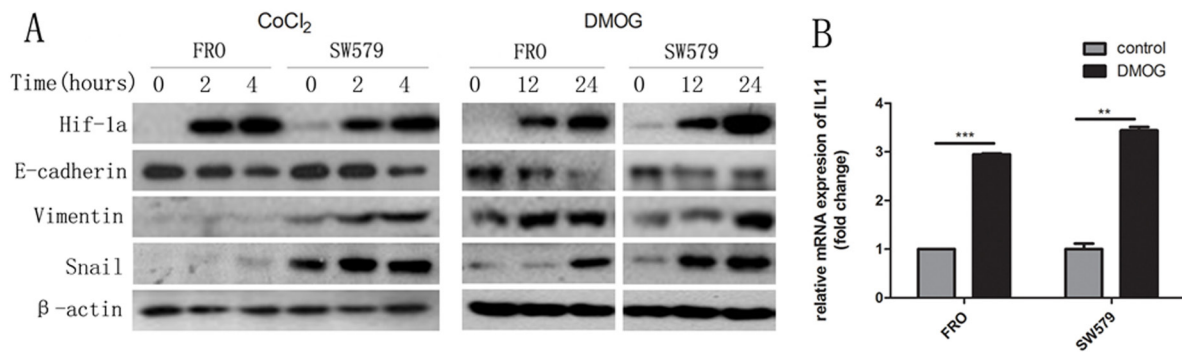

**Supplementary Figure S3: Hypoxia induces EMT via HIF-1 $\alpha$ .** **A.** Western blotting of ATC cells after treatment with 0.1 mM CoCl<sub>2</sub> or 1 mM DMOG at the indicated time using the indicated antibodies.  $\beta$ -Actin was used as a loading control. **B.** IL-11 mRNA levels of FRO and sw579 cells treated with 1 mM DMOG.
